# Supplementary material for: Noncoding dsRNA induces retinoic acid synthesis to stimulate hair follicle regeneration via TLR3
Source: PubMed Central journal article supplement (PMC6594970; doi:10.1038/s41467-019-10811-y), 2019-06-26
Supplement: 41467_2019_10811_MOESM1_ESM.pdf [file 41467_2019_10811_MOESM1_ESM.pdf]

## **Supplementary Information**

- Supplementary Figures and Legends
- Supplementary Tables

## **Noncoding dsRNA induces retinoic acid synthesis to stimulate hair follicle regeneration via TLR3**

Kim, et al.

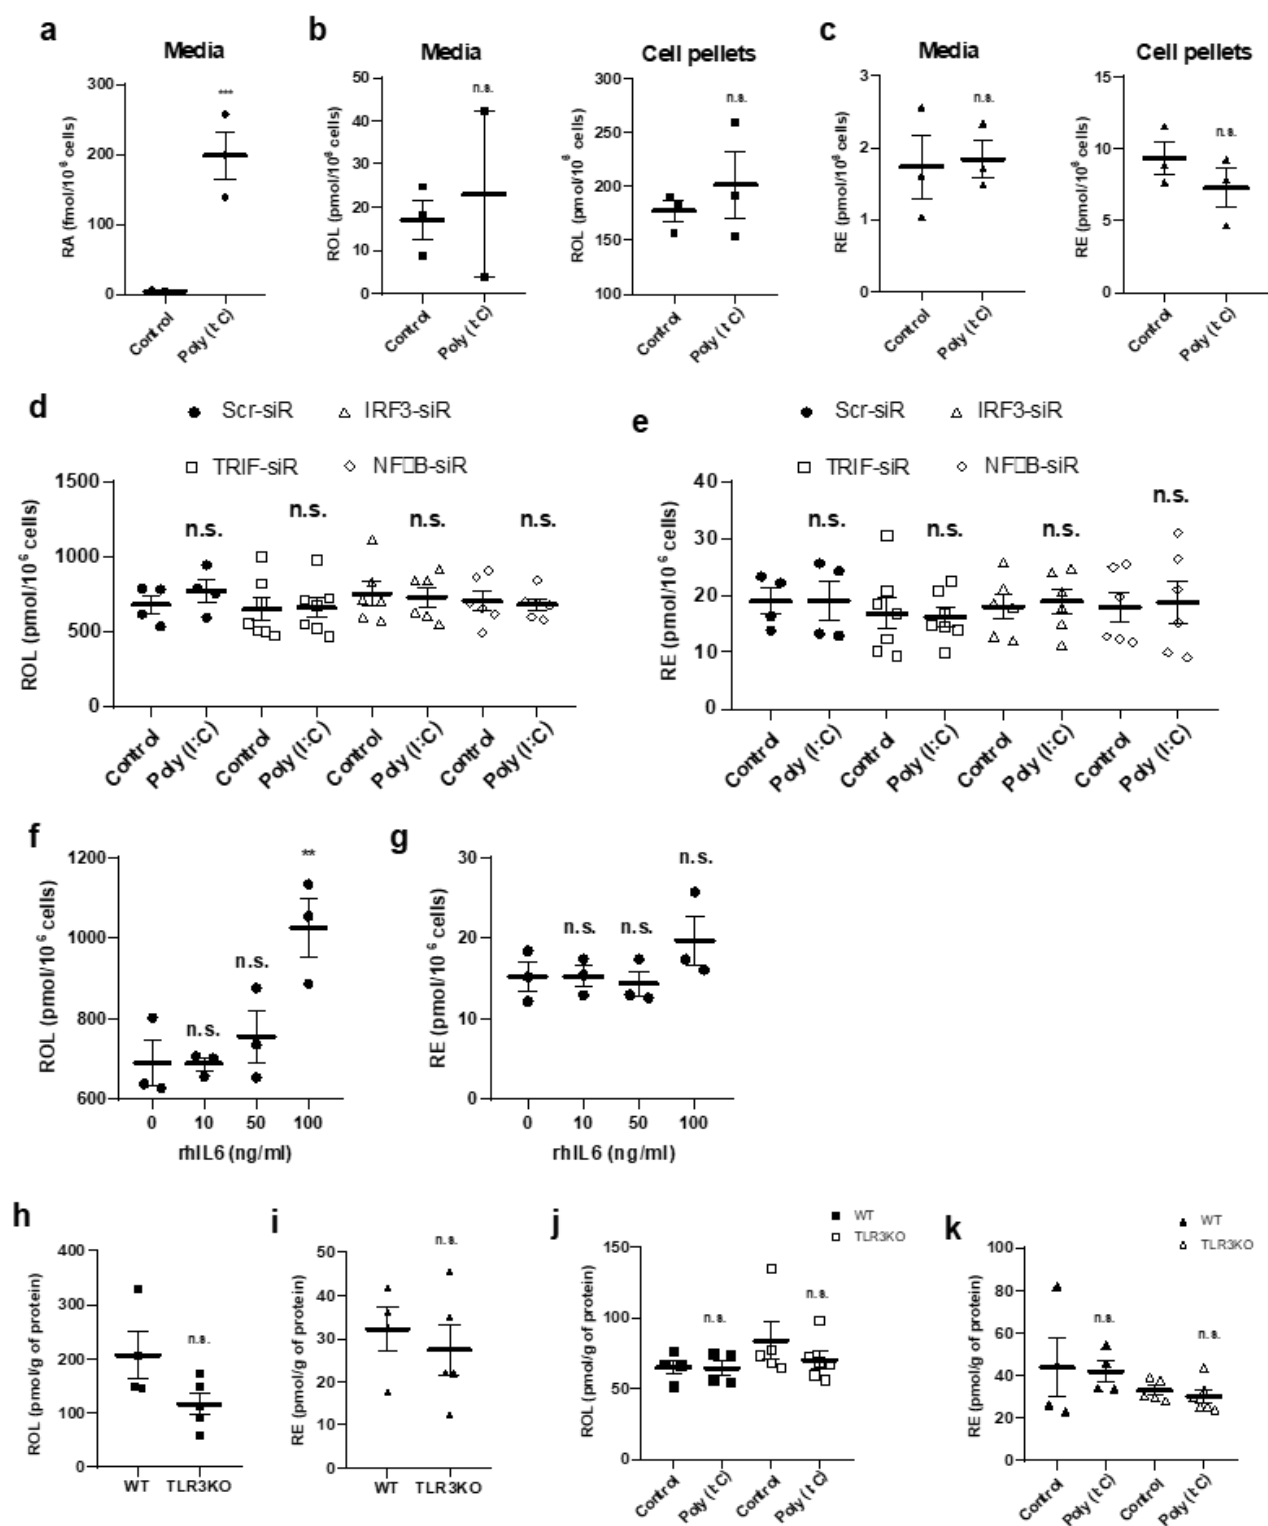

**Supplementary Figure 1. *In vitro* and *in vivo* analysis of vitamin A metabolites using LC-MS**

**a**, Analysis of RA in cultured media in human keratinocytes treated with PBS (control) and Poly (I:C) (n=3 independent experiments, \*\*\* $P < 0.001$ , paired student *t*-test). **b**, Analysis of retinol (ROL) in cultured media and cell lysates in human keratinocytes treated with PBS (control) and Poly (I:C) (n=2-3 independent experiments). n.s.; not significant. **c**, Analysis of retinyl ester (RE) in cultured media and cell lysates in human keratinocytes treated with PBS (control) and Poly (I:C) (n=3 independent experiments). n.s.; not significant. **d-e**, Analysis of ROL (d) and RE (e) in human keratinocytes transfected with TLR3 downstream targets in presence of PBS (control) and Poly (I:C) (n=4-6 independent experiments). n.s.; not significant. **f-g**, Analysis of ROL (f) and RE (g) in human keratinocytes treated with recombinant human IL6 (n=3 independent experiments, \*\* $P < 0.01$ , on-way ANOVA) **h-i**, Analysis of ROL (h) and RE (i) in unwounded skin of WT and *Tlr3*<sup>-/-</sup> mice (n=4 independent animals). n.s.; not significant. **j-k**, Analysis of ROL (j) and RE (k) in wounded skin of WT and *Tlr3*<sup>-/-</sup> mice treated with PBS (control) and Poly (I:C) (n=4-5 independent animals). n.s.; not significant. Data are means±SEM.

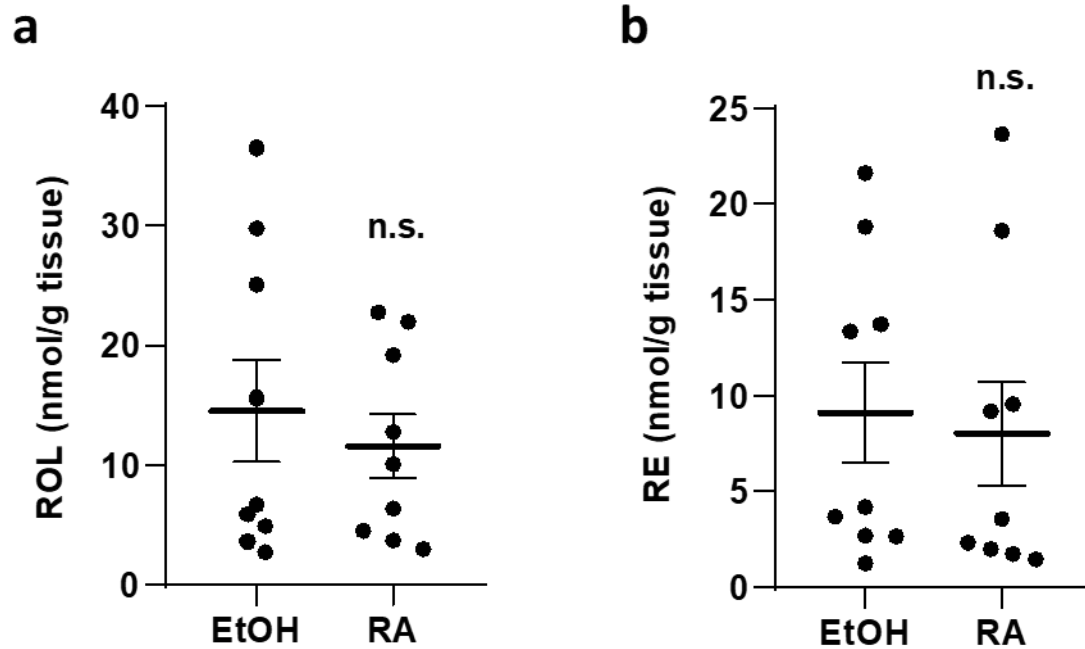

**Supplementary Figure 2. *In vivo* analysis of vitamin A metabolites in *Tlr3*<sup>-/-</sup> mice with exogenous RA treatment using LC-MS**

**a-b**, Analysis of ROL (a) and RE (b) in wounded skin of WT and *Tlr3*<sup>-/-</sup> mice with treatment of Ethanol (EtOH) and RA. (n=9 independent animals). n.s.; not significant. Data are means±SEM.

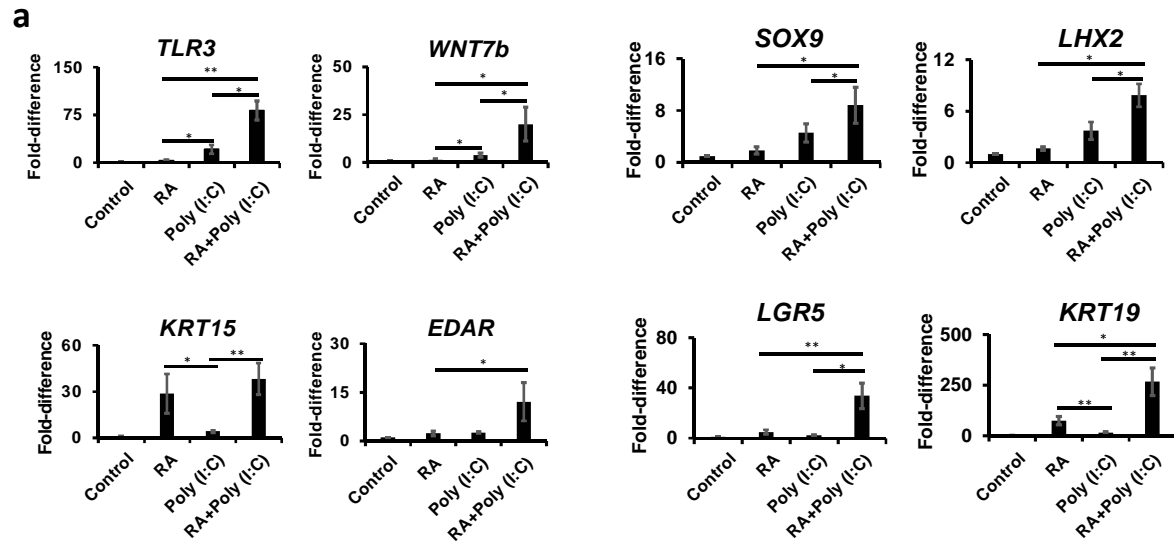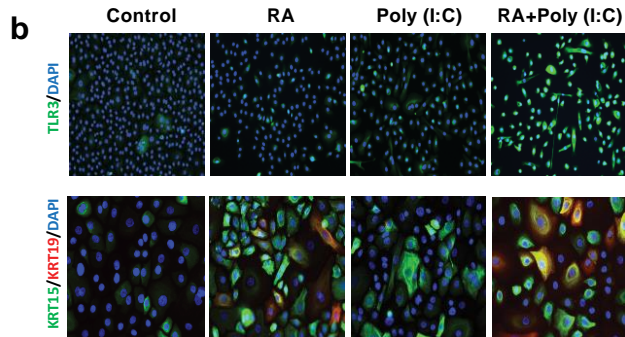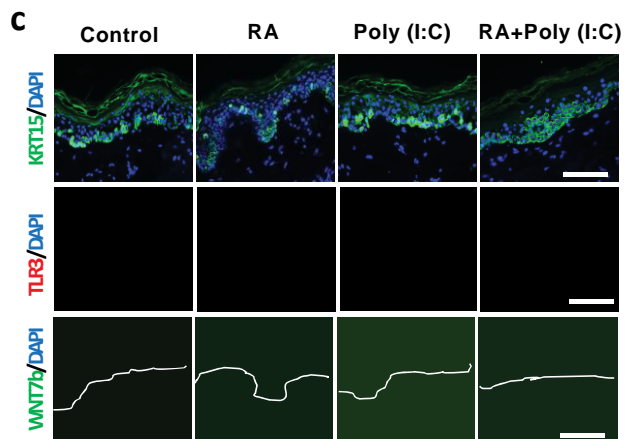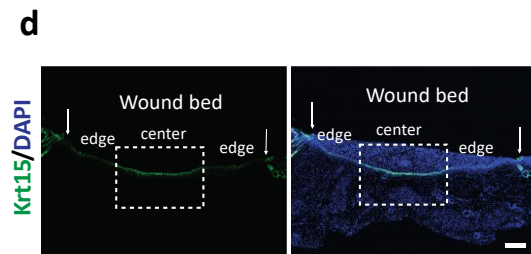

### Supplementary Figure 3. Synergistic effects of RA and Poly (I:C)

**a**, Relative mRNA expression of *TLR3*, *WNT7b*, *SOX9*, *LHX2*, *KRT15*, *EDAR*, *LGR5*, and *KRT19* in human scalp keratinocytes with RA and/or Poly (I:C). (n=5 independent experiments,

\* $P < 0.05$  and \*\* $P < 0.01$ , one-way ANOVA). **b**, Immunostaining results of TLR3 (green), KRT15 (green), and KRT19 (red) in human scalp keratinocytes with RA and/or Poly (I:C). Nucleus was stained by DAPI (blue). **c**. Human whole skin explants treated as above and stained for KRT15 (green), TLR3 (red) and WNT7b (green). White Scale bar: 100  $\mu\text{m}$ . Note suprabasal staining of KRT15/TLR3 and confluent basal layer staining of WNT7b in combination treatment. **d**, Immunostaining results of Krt15 (green) in wounded skin of WT mice at Day 11 after wounding. Nucleus was stained by DAPI (blue). White arrow indicates the edge between wounded and unwounded skin. White dashed line indicates areas with new hair follicles. White Scale bar: 100  $\mu\text{m}$ . Data are means  $\pm$  SEM.

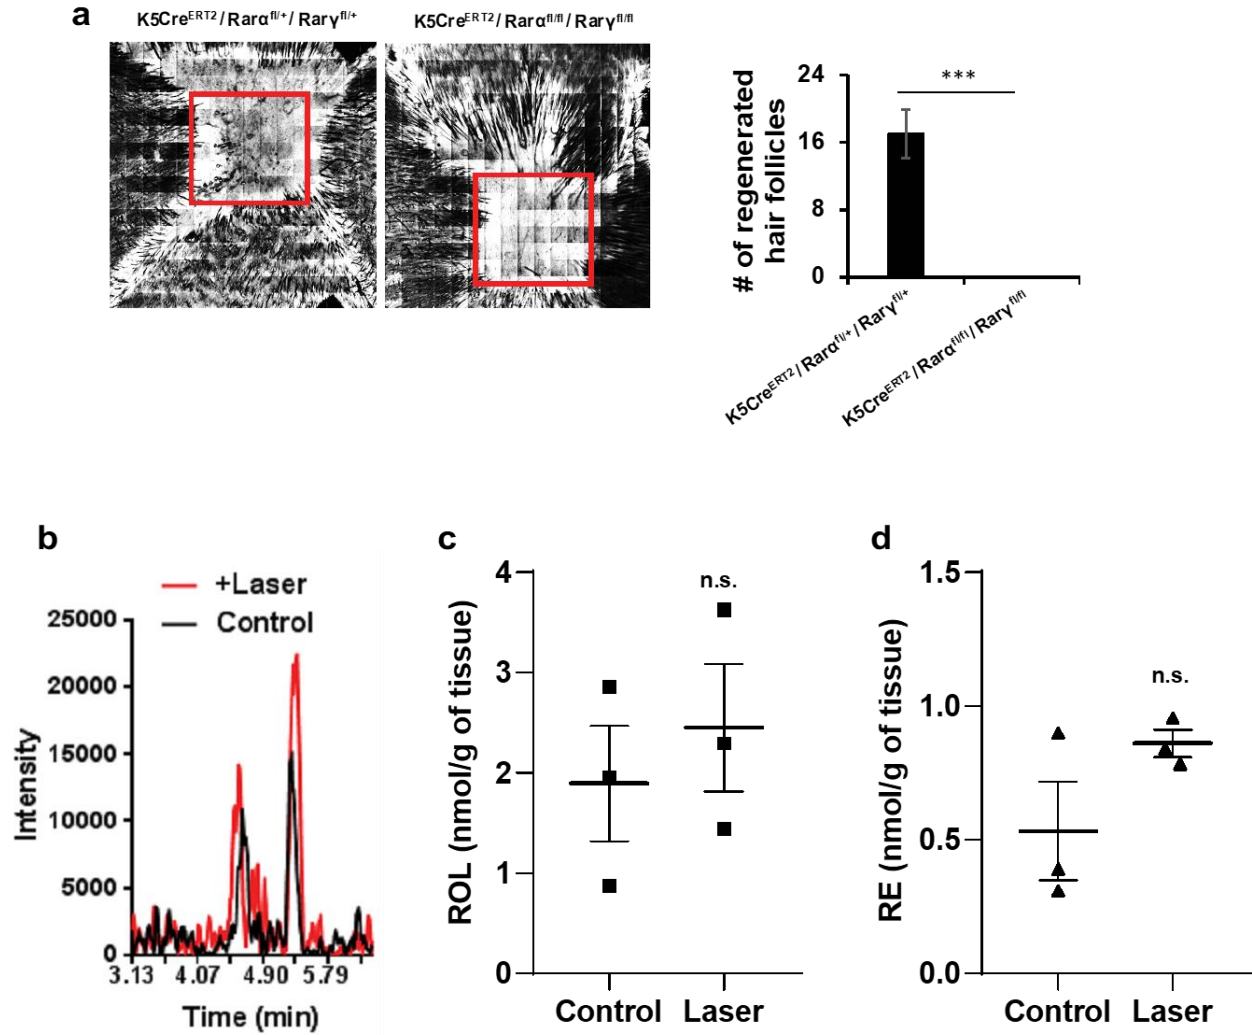

**Supplementary Figure 4. WIHN in Rar-alpha and gamma double knockout mice and analysis of vitamin A metabolites in human subjects**

**a**, Skin specific Rara and Rarg double knockout mice fail to regenerate hair follicles ( $n=4$  independent animals,  $***P<0.001$ , paired student  $t$ -test). Red square indicates areas with new hair follicles. **b**, Intensity of RA in human subjects with CO<sub>2</sub> laser treatment. **c-d**, Analysis of ROL (c) and RE (d) in human subjects with CO<sub>2</sub> laser treatment. ( $n=3$  independent human samples), n.s.; not significant. Data are means $\pm$ SEM.

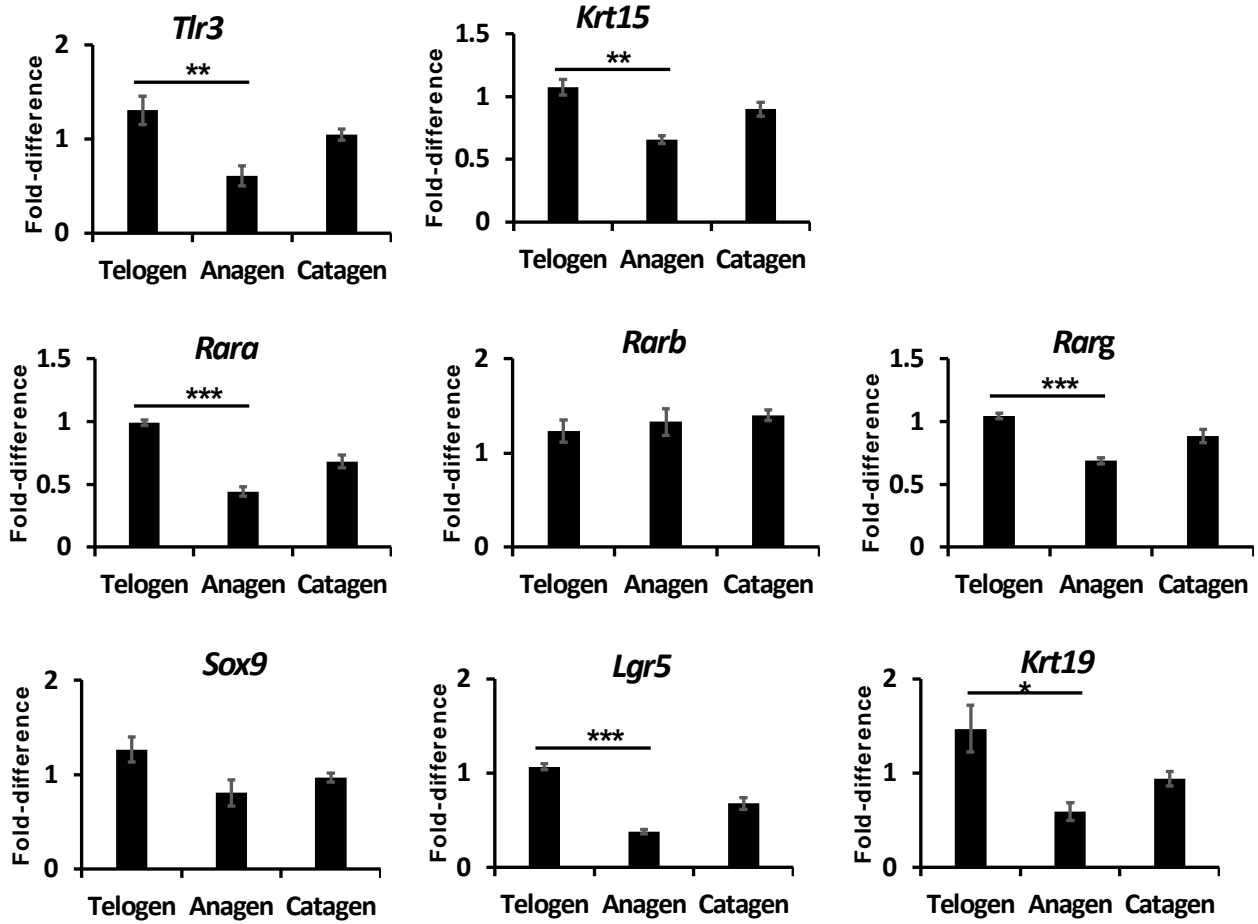

**Supplementary Figure 5. Gene expression during the hair cycle**

**a**, Relative mRNA expression of *Tlr3*, *Krt15*, *Rara*, *Rarb*, *Rarg*, *Sox9*, *Lgr5*, and *Krt19* in Krt5-Cre mouse skin during the hair cycle. (n=4-7 independent animals, \* $P < 0.05$ , \*\* $P < 0.01$ , \*\*\* $P < 0.005$ , unpaired student *t*-test). Note coordinated expression of tested genes during the quiescent telogen phase. Data are means $\pm$ SEM.



# C57BL/6J

EtOH

RA

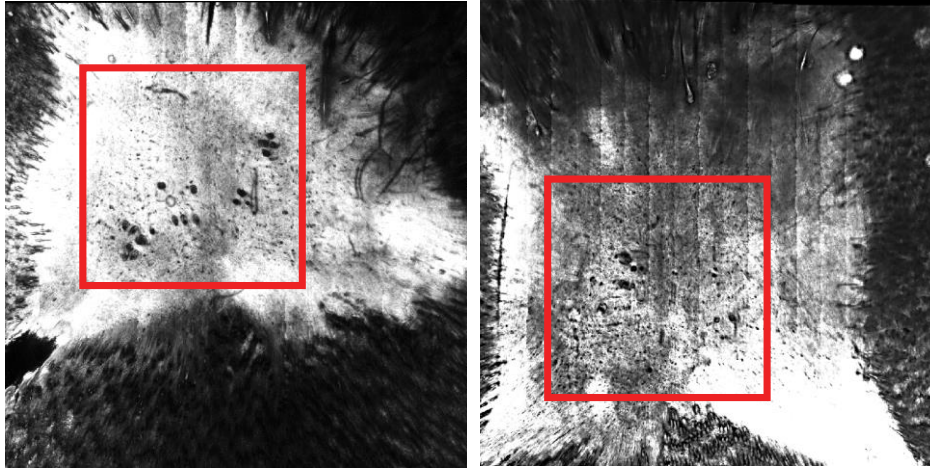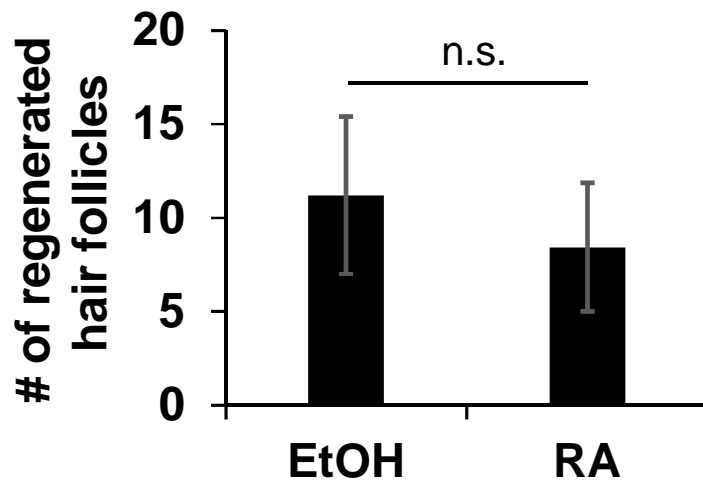

Supplementary Figure 6. Exogenous RA treatment in WT mice

**Top**, Confocal image of WT wounded skin with ethanol (EtOH) and RA treatment. **Bottom**, Quantified WIHN results (EtOH; n=5, RA; n=9 independent animals). Red square indicates areas with new hair follicles. n.s.; not significant. Data are means±SEM.

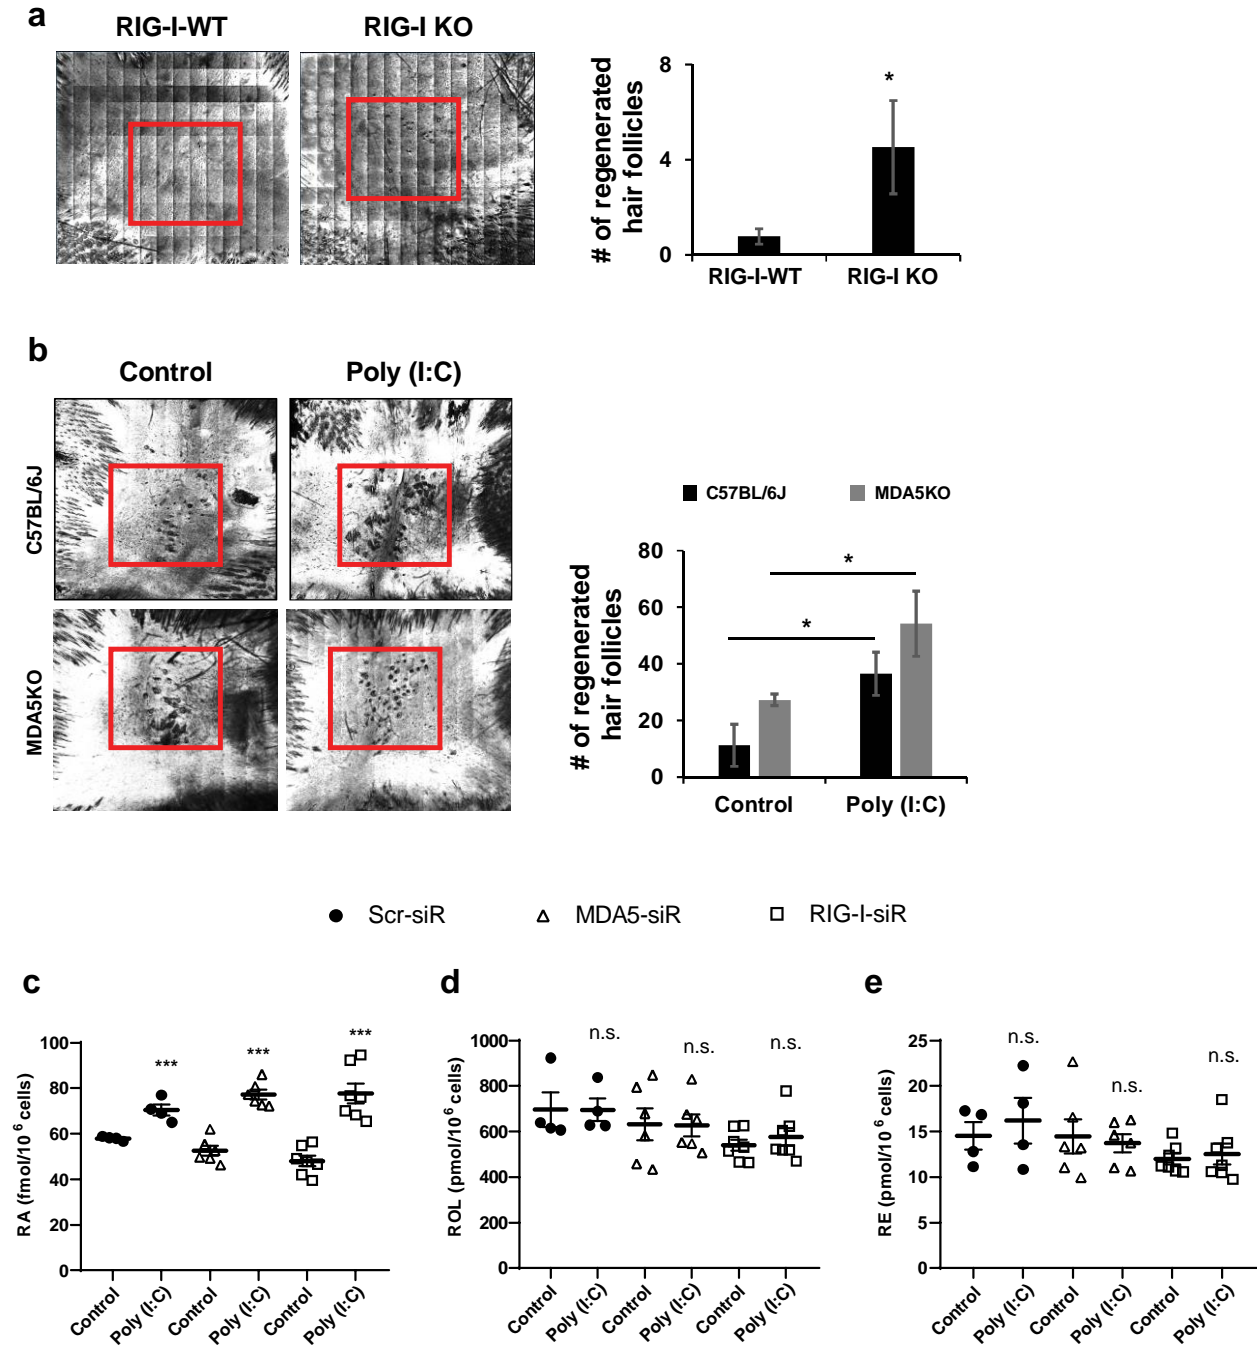

**Supplementary Figure 7. Hair follicle regeneration, Vitamin A, and its metabolites in *MDA5*<sup>-/-</sup> and *RIG-I*<sup>-/-</sup> mice**

**a**, WIHN results of strain-matched WT (n=9 independent animals) and *RIG-I*<sup>-/-</sup> (n=17 independent animals) mice (\**P*<0.05, unpaired student *t*-test). Red square indicates areas with

new hair follicles. **b**, WIHN results of WT and *MDA5*<sup>-/-</sup> mice treated with PBS (control) and Poly (I:C) (n=4-5 independent animals, \**P*<0.05, unpaired student *t*-test). Note that Poly (I:C) induces hair follicle regeneration in *MDA5*<sup>-/-</sup> mice similar to WT. **c-e**, analysis of RA (c), ROL (d), and RE (e) in human keratinocytes transfected with scrambled-, *MDA5*-, and RIG-I-siRNA in presence of PBS (Control) and Poly (I:C) (n=4-7 independent experiments, \*\*\**P*<0.001, one-way ANOVA), n.s.; not significant. Data are means±SEM.

**Supplementary Table 1. Primer sets for genotyping**

| Name              |               | Sequences (5'-3')                | Product size (bp) |
|-------------------|---------------|----------------------------------|-------------------|
| Cre               | Forward       | GAC CAG GTT CGT TCA CTC<br>ATG G | 200               |
|                   | Reverse       | AGG CTA AGT GCC TTC TCT<br>ACA C |                   |
| Rar $\alpha$ flox | Forward       | CAG GGA GGA TGC TGT TTG TA       | WT; 156           |
|                   | Reverse       | CCT ATG ACC CAG GAC TCA GC       | Mut: 189          |
| Rary flox         | Forward       | AGC TCA GTG GTG GAA TGC TT       | WT; 240           |
|                   | Reverse       | TTT TCT GAA TGC TGC GTC TG       | Mut: 280          |
| Rar $\alpha$ KO   | Forward       | TTT GCC TGC TCT TCT GAC TG       |                   |
|                   | Reverse (WT)  | ACG GTG TGC TGT AAC CAC TG       | WT; 201           |
|                   | Reverse (Mut) | GCC AGA GGC CAC TTG TGT AG       | Mut; 165          |
| Tlr3 KO           | Forward       | AAT TCA TCA GTG CCA TGA<br>GTT T |                   |
|                   | Reverse (WT)  | GCA ACC CTT TCA AAA ACC AG       | WT; 341           |
|                   | Reverse (Mut) | GCC AGA GGC CAC TTG TGT AG       | Mut; 208          |

**Supplementary Table 2. Antibodies used for western blot and immunostaining**

| Name                                         | Host   | Dilution     |                | Company/Cat No.                      |
|----------------------------------------------|--------|--------------|----------------|--------------------------------------|
|                                              |        | Western blot | Immunostaining |                                      |
| TLR3                                         | mouse  |              | 1:300          | Santa Cruz Biotechnology #sc-32232   |
| KRT19                                        | Mouse  | 1:2,000      | 1:300          | Invitrogen, #MA5-12663               |
| KRT15                                        | Rabbit | 1:2,000      | 1:300          | Sigma, HPA023910                     |
| ALDH1A3                                      | Rabbit | 1:1,000      |                | Invitrogen, #PA5-61201               |
| $\beta$ -Actin                               | Rabbit | 1:1,000      |                | Cell Signaling Technology, #4967L    |
| $\beta$ -catenin                             | mouse  | 1:1,000      |                | Millipore, 610153                    |
| Active $\beta$ -catenin                      | mouse  | 1:1,000      |                | Millipore, #05-665/clone 8E7         |
| WNT7b                                        | Rabbit |              | 1:200          | Abcam, #ab94915                      |
| Alexa Fluor®<br>488 Anti-Rabbit<br>IgG (H+L) | Goat   |              | 1:1,000        | Life Technologies, A-11034           |
| Alexa Fluor®<br>594 Anti-Rabbit<br>IgG (H+L) | Goat   |              | 1:1,000        | Life Technologies, A-11037           |
| anti-mouse<br>IgG-HRP                        |        | 1:1,000      |                | Cell Signaling Technology;<br>#7076S |
| anti-rabbit IgG-<br>HRP                      |        | 1:1,000      |                | Cell Signaling Technology;<br>#7074S |

**Supplementary Table 3. Mouse type, strain, chemical, vehicle, schedule for *in vivo* experiments**

| Mouse                      | Mouse strain                              | Treatment  | Vehicle  | Day of treatment | Note                                              |
|----------------------------|-------------------------------------------|------------|----------|------------------|---------------------------------------------------|
| Wild type (WT)             | C57BL/6J                                  | Poly (I:C) | PBS      | WD3              | JAX stock #00664                                  |
|                            |                                           | BMS493     | DMSO     | WD1              |                                                   |
| Wild type (WT)             | C57BL/6NJ                                 | Poly (I:C) | PBS      | WD3              | JAX stock #005304<br>Used for Tlr3 <sup>-/-</sup> |
|                            |                                           | RA         | Ethanol  | WD1              |                                                   |
| <i>Tlr3</i> <sup>-/-</sup> | B6N.129S1-Tlr3 <sup>tm1Flv/J</sup>        | Poly (I:C) | PBS      | WD3              | JAX stock #009675                                 |
|                            |                                           | RA         | Ethanol  | WD1              |                                                   |
| <i>Mda5</i> <sup>-/-</sup> | B6.Cg-Ifih1 <sup>tm1.1Cln/J</sup>         | Poly (I:C) | PBS      | WD3              | JAX stock #015812                                 |
| <i>Rigi</i> <sup>-/-</sup> | 129Sv/C57BL/6-Ddx58                       |            |          |                  | No treatment                                      |
| <i>Rigi</i> -WT            | 129Sv/C57BL/6                             |            |          |                  | No treatment                                      |
| <i>Rara</i> <sup>-/-</sup> | Rara <sup>tm1Rev/HsvJ</sup>               | Poly (I:C) | PBS      | WD3              | JAX stock #023845                                 |
| Krt5-CreERT2               | C57BL/6J                                  | Tamoxifen  | Corn oil | D15 to WD3       | Crossed with floxed mice                          |
| Rarα <sup>fl/fl</sup>      | C57BL/6J-Rarα floxed                      | Tamoxifen  | Corn oil | D15 to WD3       | Crossed with Krt5-CreERT2 mice                    |
| Rary <sup>fl/fl</sup>      | C57BL/6J-Rary floxed                      | Tamoxifen  | Corn oil | D15 to WD3       |                                                   |
| Rarα-Rary <sup>fl/fl</sup> | C57BL/6J-Rarα-Rary floxed (double floxed) | Tamoxifen  | Corn oil | D15 to WD3       |                                                   |

D15: 15<sup>th</sup> day after born, WD3: 3<sup>rd</sup> day after wounding
